# Supplementary material
Source: PubMed Central journal article supplement (PMC1963498)
Supplement: pcbi.0030164.st001.pdf [file pcbi.0030164.st001.pdf]

**TABLE S1**

| Design Protocol | FYN SH3 Interface Residues |          |          |          |          |          |          | Identical to Native |     |
|-----------------|----------------------------|----------|----------|----------|----------|----------|----------|---------------------|-----|
|                 | 93                         | 96       | 97       | 98       | 99       | 100      | 119      | #                   | %   |
| <b>NATIVE</b>   | <b>Y</b>                   | <b>R</b> | <b>T</b> | <b>E</b> | <b>D</b> | <b>D</b> | <b>W</b> | <b>7</b>            |     |
| <b>MULTI-</b>   | <b>R</b>                   | <b>+</b> | <b>P</b> | <b>W</b> | <b>+</b> | <b>+</b> | <b>+</b> | <b>4</b>            | 57% |
| SINLGE-1AVZ     | R                          | +        | S        | Q        | E        | +        | +        | 3                   | 43% |
| 1M27            | R                          | E        | +        | W        | +        | E        | +        | 3                   | 43% |
