# Supplementary material
Source: PubMed Central journal article supplement (PMC1963498)
Supplement: pcbi.0030164.st002.pdf [file pcbi.0030164.st002.pdf]

**TABLE S2**

| Design Protocol | Importin Beta Interface Residues |     |     |     |     |     |     |     |     |     | Identical to Native |     |
|-----------------|----------------------------------|-----|-----|-----|-----|-----|-----|-----|-----|-----|---------------------|-----|
|                 | 55                               | 106 | 156 | 159 | 239 | 274 | 278 | 281 | 288 | 342 | #                   | %   |
| <b>NATIVE</b>   | V                                | P   | Y   | Q   | Q   | E   | Q   | E   | D   | W   | 10                  |     |
| <b>MULTI-</b>   | L                                | K   | +   | E   | +   | W   | +   | +   | Y   | M   | 4                   | 40% |
| SINLGE-11BR     | L                                | M   | +   | E   | R   | H   | +   | +   | Y   | +   | 4                   | 40% |
| 1M5N            | E                                | W   | +   | K   | I   | Y   | W   | Y   | W   | E   | 1                   | 10% |
