# Supplementary material
Source: PubMed Central journal article supplement (PMC1963498)
Supplement: pcbi.0030164.st003.pdf [file pcbi.0030164.st003.pdf]

**TABLE S3**

| Design Protocol | Ovomucoid Inhibitor Interface Residues |    |    |    |    |    |    |    |    |    |    | Identical to Native |  |
|-----------------|----------------------------------------|----|----|----|----|----|----|----|----|----|----|---------------------|--|
|                 | 13                                     | 14 | 15 | 17 | 18 | 19 | 20 | 21 | 33 | 36 | #  | %                   |  |
| <b>NATIVE</b>   | K                                      | P  | A  | T  | K  | E  | Y  | R  | N  | N  | 10 |                     |  |
| <b>MULTI</b>    | W                                      | W  | P  | E  | F  | H  | W  | +  | I  | V  | 1  | 10%                 |  |
| SINGLE 1HJA     | W                                      | W  | P  | E  | F  | R  | F  | +  | I  | S  | 1  | 10%                 |  |
| 1SGP            | W                                      | W  | R  | E  | Y  | +  | R  | Q  | E  | R  | 1  | 10%                 |  |
