# Supplementary material
Source: PubMed Central journal article supplement (PMC1963498)
Supplement: pcbi.0030164.st004.pdf [file pcbi.0030164.st004.pdf]

TABLE S4

| Design Protocol |       | CheY Interface Residues |    |    |    |     |     |     |     |     |     |     | Identical to Native |     |
|-----------------|-------|-------------------------|----|----|----|-----|-----|-----|-----|-----|-----|-----|---------------------|-----|
|                 |       | 90                      | 92 | 95 | 99 | 104 | 105 | 106 | 107 | 108 | 119 | 122 | #                   | %   |
| NATIVE          |       | A                       | K  | I  | A  | S   | G   | Y   | V   | V   | K   | K   | 11                  |     |
|                 | MULTI | W                       | +  | +  | G  | P   | S   | +   | F   | S   | +   | R   | 4                   | 36% |
| SINGLE          | 1F4V  | R                       | R  | +  | W  | N   | S   | H   | W   | S   | +   | I   | 2                   | 18% |
|                 | 1FFG  | H                       | +  | Q  | +  | P   | H   | +   | W   | F   | W   | +   | 4                   | 36% |
|                 | 1KMI  | T                       | W  | +  | G  | T   | N   | H   | H   | W   | +   | R   | 2                   | 18% |
