# Supplementary material
Source: PubMed Central journal article supplement (PMC1963498)
Supplement: pcbi.0030164.st005.pdf [file pcbi.0030164.st005.pdf]

**TABLE S5**

| Design Protocol | Phosphocarrier Protein HPR Interface Residues |    |    |    |    |    |    |    |    |    |    | Identical to Native |     |
|-----------------|-----------------------------------------------|----|----|----|----|----|----|----|----|----|----|---------------------|-----|
|                 | 11                                            | 12 | 15 | 16 | 47 | 48 | 51 | 52 | 53 | 54 | 55 | #                   | %   |
| <b>NATIVE</b>   | D                                             | S  | H  | A  | I  | M  | M  | S  | L  | G  | I  | 11                  |     |
| <b>MULTI</b>    | R                                             | R  | +  | W  | H  | +  | F  | +  | H  | +  | F  | 4                   | 36% |
| SINGLE 1KKL     | R                                             | G  | R  | S  | R  | +  | W  | +  | H  | +  | Y  | 3                   | 27% |
| 1RZR            | H                                             | W  | +  | W  | H  | L  | F  | Q  | W  | +  | E  | 2                   | 18% |
