# Supplementary material
Source: PubMed Central journal article supplement (PMC1963498)
Supplement: pcbi.0030164.st006.pdf [file pcbi.0030164.st006.pdf]

TABLE S6

| Design Protocol | Thioredoxin Interface Residues |    |    |    |    |    |    |    |    |    |    |    | Identical to Native |     |
|-----------------|--------------------------------|----|----|----|----|----|----|----|----|----|----|----|---------------------|-----|
|                 | 31                             | 34 | 37 | 60 | 72 | 73 | 74 | 75 | 91 | 93 | 94 | 98 | #                   | %   |
| NATIVE          | W                              | P  | M  | I  | I  | R  | G  | I  | V  | A  | L  | Q  | 12                  |     |
| MULTI           | +                              | +  | R  | H  | E  | W  | +  | +  | W  | L  | Q  | W  | 4                   | 33% |
| SINGLE 1F6M     | +                              |    | M  | R  | +  | M  | W  | +  | N  | W  | Q  | W  | 3                   | 25% |
| 1T7P            | +                              | +  |    | W  | F  | W  | +  | H  | T  | +  | I  | Q  | 4                   | 33% |
