# Supplementary material
Source: PubMed Central journal article supplement (PMC1963498)
Supplement: pcbi.0030164.st007.pdf [file pcbi.0030164.st007.pdf]

**TABLE S7**

| Design Protocol | IL-6 Interface Residues |     |     |     |     |     |     |     |     |     |     |     |     | Identical to Native |    |     |
|-----------------|-------------------------|-----|-----|-----|-----|-----|-----|-----|-----|-----|-----|-----|-----|---------------------|----|-----|
|                 | 142                     | 144 | 145 | 147 | 165 | 166 | 167 | 168 | 169 | 170 | 193 | 226 | 229 | 230                 | #  | %   |
| <b>NATIVE</b>   | W                       | T   | H   | F   | S   | T   | V   | Y   | F   | V   | D   | S   | S   | V                   | 14 |     |
| <b>MULTI</b>    | +                       | R   | R   | +   | +   | H   | I   | +   | +   | F   | F   | K   | H   | +                   | 6  | 43% |
| SINGLE 111R     | +                       | R   | R   | +   | +   | E   | I   | +   | +   | F   | R   | K   | H   | D                   | 5  | 36% |
| 1P9M            | +                       | E   | R   | R   | A   | H   | I   | P   | +   | +   | F   | E   | S   | F                   | 3  | 21% |
