# Supplementary material
Source: PubMed Central journal article supplement (PMC1963498)
Supplement: pcbi.0030164.st008.pdf [file pcbi.0030164.st008.pdf]

**TABLE S8**

| Design Protocol | Beta Lactamase Interface Residues |     |     |     |     |     |     |     |     |     |     |     |     |     | Identical to Native |     |
|-----------------|-----------------------------------|-----|-----|-----|-----|-----|-----|-----|-----|-----|-----|-----|-----|-----|---------------------|-----|
|                 | 99                                | 100 | 102 | 103 | 104 | 105 | 106 | 107 | 110 | 111 | 129 | 216 | 237 | 270 | #                   | %   |
| <b>NATIVE</b>   | Q                                 | N   | L   | V   | E   | Y   | S   | P   | E   | K   | M/L | V   | A   | M   | 14                  |     |
| <b>MULTI</b>    | H                                 | W   | R   | E   | +   | +   | G   | H   | +   | +   | Q   | S   | G   | W   | 4                   | 29% |
| SINGLE 1JTD     | +                                 | W   | H   | H   | P   | W   | L   | H   | +   | +   | Q   | H   | G   | W   | 3                   | 21% |
| 1JTG            | F                                 | W   | W   | E   | +   | +   | K   | H   | H   | Q   | Q   | S   | N   | W   | 2                   | 14% |
