# Supplementary material
Source: PubMed Central journal article supplement (PMC1963498)
Supplement: pcbi.0030164.st009.pdf [file pcbi.0030164.st009.pdf]

**TABLE S9**

| Design Protocol | Elastase Interface Residues |    |    |     |     |     |     |     |     |     |     |     |     |     |     | Identical to Native |     |
|-----------------|-----------------------------|----|----|-----|-----|-----|-----|-----|-----|-----|-----|-----|-----|-----|-----|---------------------|-----|
|                 | 41                          | 57 | 61 | 172 | 175 | 190 | 192 | 193 | 194 | 195 | 213 | 214 | 215 | 216 | 217 | #                   | %   |
| <b>NATIVE</b>   | T                           | H  | R  | W   | T   | G   | Q   | G   | D   | S   | T   | S   | F   | V   | S   | 15                  |     |
| <b>MULTI</b>    | L                           | F  | +  | +   | K   | +   | +   | D   | P   | L   | A   | Y   | Y   | T   | N   | 4                   | 27% |
| SINGLE 1EA1     | L                           | F  | V  | +   | K   | +   | +   | N   | P   | I   | M   | K   | W   | T   | W   | 3                   | 20% |
| 1FLE            | L                           | F  | M  | Y   | W   | Y   | +   | N   | V   | L   | L   | Y   | +   | I   | W   | 2                   | 13% |
| 1MCV            | +                           | F  | +  | +   | W   | +   | +   | H   | P   | L   | K   | L   | Y   | A   | P   | 5                   | 33% |
