# Supplementary material
Source: PubMed Central journal article supplement (PMC1963498)
Supplement: pcbi.0030164.st010.pdf [file pcbi.0030164.st010.pdf]

**TABLE S10**

| Design Protocol | Peroxisome Proliferator Receptor Interface Residues |     |     |     |     |     |     |     |     |     |     |     |     |     |     | Identical to Native |     |
|-----------------|-----------------------------------------------------|-----|-----|-----|-----|-----|-----|-----|-----|-----|-----|-----|-----|-----|-----|---------------------|-----|
|                 | 396                                                 | 410 | 414 | 430 | 432 | 433 | 434 | 436 | 437 | 439 | 440 | 443 | 444 | 447 | 451 | #                   | %   |
| <b>NATIVE</b>   | D                                                   | Q   | L   | Q   | F   | A   | K   | L   | Q   | M   | T   | R   | Q   | T   | Q   | 15                  |     |
| <b>MULTI</b>    | W                                                   | +   | +   | +   | Y   | +   | R   | H   | E   | K   | E   | P   | W   | H   | +   | 5                   | 33% |
| SINGLE 1K74     | W                                                   | M   | +   | K   | R   | P   | W   | Y   | E   | H   | Y   | D   | W   | W   | N   | 1                   | 7%  |
| 2PRG            | +                                                   | +   | H   | +   | Y   | +   | W   | H   | W   | K   | D   | F   | E   | Q   | +   | 5                   | 33% |
