# Supplementary material
Source: PubMed Central journal article supplement (PMC1963498)
Supplement: pcbi.0030164.st011.pdf [file pcbi.0030164.st011.pdf]

TABLE S11

| Design Protocol |      | Ran Interface Residues |    |    |    |    |    |    |    |    |    |    |    |    |    |    |     |     |     | Identical to Native |     |
|-----------------|------|------------------------|----|----|----|----|----|----|----|----|----|----|----|----|----|----|-----|-----|-----|---------------------|-----|
|                 |      | 43                     | 44 | 45 | 67 | 68 | 70 | 71 | 74 | 75 | 76 | 77 | 78 | 79 | 95 | 96 | 106 | 110 | 134 | #                   | %   |
| NATIVE          |      | L                      | G  | V  | A  | G  | E  | K  | G  | L  | R  | D  | G  | Y  | R  | V  | R   | R   | K   | 18                  |     |
| MULTI           |      | E                      | +  | M  | G  | +  | H  | +  | +  | +  | +  | +  | +  | A  | +  | H  | +   | +   | +   | 12                  | 67% |
| SINGLE          | 1A2K | Q                      | +  | W  | V  | +  | W  | +  | H  | G  | +  | R  | +  | Q  | L  | R  | Y   | M   | V   | 5                   | 28% |
|                 | 1I2M | R                      | R  | E  | H  | +  | R  | E  | +  | G  | +  | R  | L  | V  | +  | H  | +   | F   | +   | 6                   | 33% |
|                 | 1IBR | K                      | M  | L  | T  | +  | W  | W  | S  | +  | +  | +  | T  | F  | N  | G  | Q   | +   | W   | 5                   | 28% |
|                 | 1K5D | +                      | +  | P  | G  | F  | Y  | R  | D  | +  | L  | I  | F  | G  | +  | R  | G   | Y   | R   | 4                   | 22% |
|                 | 1WA5 | E                      | S  | E  | T  | Y  | R  | D  | +  | +  | +  | +  | M  | E  | +  | K  | +   | E   | +   | 7                   | 39% |
