# Supplementary material
Source: PubMed Central journal article supplement (PMC1963498)
Supplement: pcbi.0030164.st012.pdf [file pcbi.0030164.st012.pdf]

TABLE S12

| Design Protocol |      | Ras Interface Residues |          |          |          |          |          |          |          |          |          |          |          |          |          |          |          |          |          |          | Identical to Native |            |
|-----------------|------|------------------------|----------|----------|----------|----------|----------|----------|----------|----------|----------|----------|----------|----------|----------|----------|----------|----------|----------|----------|---------------------|------------|
|                 |      | 13                     | 21       | 25       | 31       | 32       | 33       | 34       | 36       | 37       | 38       | 39       | 40       | 41       | 54       | 61       | 63       | 64       | 67       | 70       | #                   | %          |
| <b>NATIVE</b>   |      | <b>G</b>               | <b>I</b> | <b>Q</b> | <b>E</b> | <b>Y</b> | <b>D</b> | <b>P</b> | <b>I</b> | <b>E</b> | <b>D</b> | <b>S</b> | <b>Y</b> | <b>R</b> | <b>D</b> | <b>Q</b> | <b>E</b> | <b>Y</b> | <b>M</b> | <b>Q</b> | <b>19</b>           |            |
| <b>MULTI</b>    |      | <b>D</b>               | <b>L</b> | <b>R</b> | <b>R</b> | <b>H</b> | +        | +        | +        | +        | +        | +        | +        | +        | +        | +        | +        | +        | <b>H</b> | +        | <b>13</b>           | <b>68%</b> |
| SINGLE          | 1BKD | H                      | +        | F        | W        | H        | E        | S        | V        | +        | +        | N        | +        | W        | +        | +        | +        | +        | H        | +        | 9                   | 47%        |
|                 | 1HE8 | L                      | M        | R        | R        | W        | E        | K        | R        | +        | P        | +        | H        | W        | I        | G        | W        | H        | W        | K        | 2                   | 11%        |
|                 | 1K8R | P                      | R        | W        | M        | S        | W        | V        | E        | +        | +        | +        | D        | +        | +        | T        | K        | +        | W        | K        | 6                   | 32%        |
|                 | 1LFD | +                      | F        | R        | R        | R        | +        | N        | W        | +        | E        | R        | W        | M        | W        | E        | W        | T        | M        | R        | 3                   | 16%        |
|                 | 1WQ1 | D                      | R        | R        | +        | H        | +        | +        | +        | M        | +        | H        | S        | W        | W        | +        | +        | +        | W        | W        | 8                   | 42%        |
