# Supplementary material
Source: PubMed Central journal article supplement (PMC1963498)
Supplement: pcbi.0030164.st013.pdf [file pcbi.0030164.st013.pdf]

**TABLE S13**

| Design Protocol |      | Actin Interface Residues |     |     |     |     |     |     |     |     |     |     |     |     |     |     |     |     | Identical to Native |     |     |    |     |
|-----------------|------|--------------------------|-----|-----|-----|-----|-----|-----|-----|-----|-----|-----|-----|-----|-----|-----|-----|-----|---------------------|-----|-----|----|-----|
|                 |      | 113                      | 143 | 144 | 145 | 146 | 147 | 148 | 166 | 167 | 169 | 173 | 286 | 287 | 288 | 290 | 345 | 355 | 371                 | 372 | 373 | #  | %   |
| <b>NATIVE</b>   |      | K                        | Y   | A   | S   | G   | R   | T   | Y   | E   | Y   | H   | D   | V   | D   | R   | I   | M   | H                   | R   | K   | 20 |     |
| <b>MULTI</b>    |      | R                        | +   | S   | R   | +   | +   | S   | +   | H   | +   | E   | +   | H   | W   | +   | +   | W   | R                   | N   | N   | 8  | 40% |
| SINGLE          | 1EQY | S                        | +   | S   | F   | S   | P   | S   | S   | W   | +   | F   | R   | A   | P   | L   | +   | F   | Q                   | E   | W   | 3  | 15% |
|                 | 1HLU | R                        | W   | I   | H   | F   | T   | +   | +   | W   | +   | F   | +   | R   | +   | W   | H   | W   | R                   | +   | M   | 6  | 30% |
|                 | 1LOT | R                        | F   | L   | R   | +   | +   | M   | +   | H   | Q   | E   | H   | H   | W   | +   | F   | W   | Q                   | N   | H   | 4  | 20% |
