# Supplementary material
Source: PubMed Central journal article supplement (PMC1963498)
Supplement: pcbi.0030164.st014.pdf [file pcbi.0030164.st014.pdf]

**TABLE S14**

| Design Protocol |      | Transducin Beta Gamma Interface Residues |    |    |    |    |    |    |    |     |     |     |     |     |     |     |     |     |     |     |     | Identical to Native |    |     |
|-----------------|------|------------------------------------------|----|----|----|----|----|----|----|-----|-----|-----|-----|-----|-----|-----|-----|-----|-----|-----|-----|---------------------|----|-----|
|                 |      | 55                                       | 57 | 59 | 75 | 76 | 78 | 98 | 99 | 101 | 117 | 119 | 144 | 145 | 186 | 188 | 228 | 230 | 246 | 290 | 314 | 332                 | #  | %   |
| <b>NATIVE</b>   |      | L                                        | K  | Y  | Q  | D  | K  | S  | W  | M   | L   | N   | G   | Y   | D   | M   | D   | N   | D   | D   | R   | W                   | 21 |     |
| <b>MULTI</b>    |      | R                                        | +  | +  | +  | R  | H  | +  | +  | +   | +   | +   | P   | +   | +   | +   | +   | D   | +   | N   | +   | +                   | 15 | 71% |
| SINGLE          | 1A0R | R                                        | +  | +  | M  | E  | A  | +  | +  | P   | H   | R   | P   | H   | +   | +   | E   | D   | +   | N   | K   | +                   | 8  | 38% |
|                 | 1GP2 | W                                        | +  | F  | +  | Q  | +  | R  | +  | R   | +   | +   | T   | H   | +   | L   | +   | D   | +   | Y   | S   | +                   | 10 | 48% |
|                 | 1OMW | R                                        | R  | K  | +  | K  | H  | +  | +  | +   | +   | Y   | D   | W   | R   | +   | E   | E   | W   | Y   | +   | +                   | 8  | 38% |
