# Supplementary material
Source: PubMed Central journal article supplement (PMC1963498)
Supplement: pcbi.0030164.st015.pdf [file pcbi.0030164.st015.pdf]

**TABLE S15**

| Design Protocol |      | FC Interface Residues |     |     |     |     |     |     |     |     |     |     |     |     |     |     |     |     | Identical to Native |     |     |     |    |     |
|-----------------|------|-----------------------|-----|-----|-----|-----|-----|-----|-----|-----|-----|-----|-----|-----|-----|-----|-----|-----|---------------------|-----|-----|-----|----|-----|
|                 |      | 248                   | 250 | 251 | 252 | 253 | 254 | 255 | 310 | 311 | 314 | 380 | 382 | 385 | 386 | 387 | 428 | 433 | 434                 | 435 | 436 | 438 | #  | %   |
| <b>NATIVE</b>   |      | K                     | T   | L   | M   | I   | S   | R   | H   | Q   | L   | E   | E   | G   | Q   | P   | M   | H   | N                   | H   | Y   | Q   | 21 |     |
| <b>MULTI</b>    |      | +                     | M   | +   | +   | +   | +   | +   | E   | K   | Y   | +   | +   | +   | W   | +   | +   | R   | +                   | F   | +   | +   | 14 | 67% |
| SINGLE          | 1ADQ | W                     | P   | W   | P   | R   | +   | +   | S   | F   | G   | H   | K   | +   | W   | S   | +   | G   | D                   | W   | W   | R   | 4  | 19% |
|                 | 1DN2 | M                     | V   | A   | +   | R   | R   | +   | Y   | W   | W   | +   | Y   | R   | P   | F   | L   | W   | +                   | F   | +   | H   | 5  | 24% |
|                 | 1FC2 | R                     | R   | F   | H   | +   | +   | W   | +   | +   | W   | R   | V   | P   | V   | Y   | Y   | R   | +                   | +   | W   | I   | 6  | 29% |
|                 | 1FCC | +                     | +   | G   | +   | R   | +   | K   | R   | W   | K   | +   | +   | W   | W   | K   | +   | +   | +                   | R   | +   | +   | 11 | 52% |
