# Supplementary material
Source: PubMed Central journal article supplement (PMC1963498)
Supplement: pcbi.0030164.st016.pdf [file pcbi.0030164.st016.pdf]

TABLE S16

| Design Protocol |      | Rac Interface Residues |    |    |    |    |    |    |    |    |    |    |    |    |    |    |    |    |    |    |    | Identical to Native |    |     |
|-----------------|------|------------------------|----|----|----|----|----|----|----|----|----|----|----|----|----|----|----|----|----|----|----|---------------------|----|-----|
|                 |      | 12                     | 13 | 31 | 32 | 33 | 34 | 35 | 36 | 37 | 38 | 56 | 57 | 58 | 61 | 62 | 63 | 64 | 66 | 67 | 70 | 73                  | #  | %   |
| NATIVE          |      | G                      | A  | E  | Y  | I  | P  | T  | V  | F  | D  | W  | D  | T  | Q  | E  | D  | Y  | R  | L  | L  | P                   | 21 |     |
| MULTI           |      | +                      | G  | +  | +  | E  | +  | H  | +  | +  | +  | +  | H  | D  | +  | D  | +  | +  | +  | +  | +  | W                   | 14 | 67% |
| SINGLE          | 1E96 | E                      | W  |    | P  | R  | G  | H  | W  | P  | R  | G  | G  | E  | R  | N  | P  | K  | G  | +  | P  | T                   | 2  | 10% |
|                 | 1G4U | +                      | G  | +  |    | E  | +  | E  | +  | +  | E  | K  | K  | R  | +  | H  | +  | +  | M  | M  | W  | L                   | 9  | 43% |
|                 | 1HE1 | +                      | N  | Q  | +  | Q  | +  | E  | I  | +  | +  | +  | K  | R  | +  | +  | +  | W  | +  | +  | R  | R                   | 11 | 52% |
|                 | 1HH4 | +                      | R  | R  | S  | F  | W  | K  | T  | T  | F  | +  | S  | D  | N  | K  | R  | +  | +  | +  | +  | S                   | 6  | 29% |
| 1I4T            |      | L                      | M  | N  | R  | R  | R  | L  | Y  | +  | H  | +  | P  | H  | R  | I  | R  | W  | +  | H  | W  | R                   | 3  | 14% |
