# Supplementary material
Source: PubMed Central journal article supplement (PMC1963498)
Supplement: pcbi.0030164.st017.pdf [file pcbi.0030164.st017.pdf]

TABLE S17

| Design Protocol |        | Ubiquitin Interface Residues |     |     |     |     |     |     |     |     |     |     |     |     |     |     |     |     |     |     |     |     |     |     |     | Identical to Native |     |     |
|-----------------|--------|------------------------------|-----|-----|-----|-----|-----|-----|-----|-----|-----|-----|-----|-----|-----|-----|-----|-----|-----|-----|-----|-----|-----|-----|-----|---------------------|-----|-----|
|                 |        | 306                          | 307 | 308 | 309 | 310 | 311 | 334 | 336 | 340 | 342 | 344 | 345 | 346 | 347 | 348 | 349 | 362 | 364 | 365 | 366 | 368 | 370 | 371 | 372 | #                   | %   |     |
| NATIVE          |        | K                            | T   | L   | T   | G   | K   | E   | I   | Q   | R   | I   | F   | A   | G   | K   | Q   | Q   | E   | S   | T   | H   | V   | L   | R   | 24                  |     |     |
| MULTI           | SINGLE | +                            | P   | +   | +   | +   | R   | W   | H   | E   | +   | +   | Q   | D   | +   | +   | K   | W   | +   | +   | S   | R   | +   | N   | +   | 12                  | 50% |     |
|                 | 1CMX   | +                            | P   | +   | +   | +   | R   | R   | W   | Q   | R   | Q   | F   | D   | R   | +   | D   | R   | P   | D   | W   | R   | M   | M   | F   | +                   | 5   | 21% |
|                 | 1FXT   | H                            | S   | M   |     | R   | +   | P   | W   | K   | G   | +   | +   | W   | G   | R   | P   | K   | A   | N   | L   | E   | W   | +   | W   | +                   | 5   | 21% |
|                 | 1NBF   | R                            | L   | +   |     | R   | S   | R   | T   | H   | E   | +   | D   | Q   | R   | +   | +   | +   | D   | +   | T   | S   | R   | S   | I   | +                   | 7   | 29% |
|                 | 1S1Q   | P                            | G   | R   |     | A   | Q   | H   | K   | K   | P   | +   | +   | W   | P   | +   | W   | A   | W   | M   | +   | E   | S   | N   | P   | G                   | 4   | 17% |
|                 | 1WR6   | Q                            | R   | +   |     | H   | N   | G   | V   | F   | V   | K   | H   | N   | D   | +   | H   | K   | R   | W   | Y   | V   | W   | I   | W   | K                   | 2   | 8%  |
|                 | 1WRD   | +                            | V   | R   |     | W   | H   | P   | T   | H   | F   | W   | L   | R   | R   | +   | R   | K   | K   | W   | W   | L   | +   | R   | T   | P                   | 3   | 13% |
|                 | 2D3G   | +                            | N   | I   |     | R   | S   | G   | G   | L   | E   | +   | +   | S   | H   | H   | G   | M   | I   | V   | K   | G   | +   | Q   | W   | H                   | 4   | 17% |
