# Supplementary material
Source: PubMed Central journal article supplement (PMC1963498)
Supplement: pcbi.0030164.st018.pdf [file pcbi.0030164.st018.pdf]

**TABLE S18**

| Design Protocol |      | CDC42 Interface Residues |    |    |    |    |    |    |    |    |    |    |    |    |    |    |    |    |    |    |    |    |    |    | Identical to Native |     |     |
|-----------------|------|--------------------------|----|----|----|----|----|----|----|----|----|----|----|----|----|----|----|----|----|----|----|----|----|----|---------------------|-----|-----|
|                 |      | 32                       | 33 | 34 | 35 | 36 | 37 | 38 | 39 | 40 | 41 | 56 | 57 | 59 | 60 | 61 | 62 | 63 | 64 | 65 | 66 | 67 | 70 | 71 | 74                  | #   | %   |
| <b>NATIVE</b>   |      | Y                        | V  | P  | T  | V  | F  | D  | N  | Y  | A  | F  | D  | A  | G  | Q  | E  | D  | Y  | D  | R  | L  | L  | S  | Q                   | 24  |     |
| <b>MULTI</b>    |      | +                        | H  | E  | S  | T  | +  | W  | +  | +  | +  | M  | +  | N  | +  | +  | +  | +  | R  | +  | +  | +  | +  | R  | 15                  | 63% |     |
| SINGLE          | 1DOA | I                        | P  | R  | W  | S  | S  | W  | F  | W  | G  | Y  | W  | W  | N  | K  | T  | W  | +  | R  | +  | +  | +  | R  | W                   | 4   | 17% |
|                 | 1GRN | W                        | H  | E  | P  | Q  | +  | W  | I  | T  | L  | D  | F  | I  | H  | +  | +  | +  | +  | R  | W  | I  | R  | F  | S                   | 5   | 21% |
|                 | 1GZS | +                        | W  | E  | +  | E  | W  | R  | R  | H  | +  | M  | P  | K  | +  | +  | M  | M  | F  | N  | +  | +  | H  | +  | R                   | 8   | 33% |
|                 | 1KI1 | T                        | G  | N  | S  | +  | D  | W  | +  | W  | W  | +  | H  | H  | +  | D  | Y  | R  | F  | P  | +  | +  | +  | M  | N                   | 7   | 29% |
|                 | 1NF3 | L                        | H  | R  | W  | S  | +  | W  | F  | +  | L  | Y  | G  | K  | Q  | T  | Y  | P  | K  | K  | W  | W  | +  | W  | M                   | 3   | 13% |
