# Supplementary material
Source: PubMed Central journal article supplement (PMC1963498)
Supplement: pcbi.0030164.st019.pdf [file pcbi.0030164.st019.pdf]

**TABLE S19**

| Design Protocol |      | RXR Receptor Interface Residues |     |     |     |     |     |     |     |     |     |     |     |     |     |     |     |     |     |     |     |     |     |     | Identical to Native |     |    |     |
|-----------------|------|---------------------------------|-----|-----|-----|-----|-----|-----|-----|-----|-----|-----|-----|-----|-----|-----|-----|-----|-----|-----|-----|-----|-----|-----|---------------------|-----|----|-----|
|                 |      | 348                             | 352 | 356 | 373 | 379 | 390 | 393 | 394 | 397 | 398 | 401 | 413 | 415 | 416 | 417 | 419 | 420 | 421 | 422 | 423 | 424 | 426 | 427 | 430                 | 434 | #  | %   |
| <b>NATIVE</b>   |      | R                               | E   | K   | I   | D   | E   | R   | E   | Y   | A   | E   | G   | F   | A   | K   | L   | L   | R   | L   | P   | A   | R   | S   | L                   | E   | 25 |     |
| <b>MULTI</b>    |      | H                               | R   | +   | T   | +   | +   | +   | +   | +   | M   | +   | M   | +   | P   | R   | +   | +   | +   | H   | +   | S   | M   | M   | H                   | +   | 13 |     |
| SINGLE          | 1DKF | H                               | R   | +   | M   | Q   | +   | I   | H   | W   | W   | +   | P   | +   | P   | R   | +   | R   | W   | N   | S   | S   | M   | L   | R                   | +   | 5  | 20% |
|                 | 1FM6 | W                               | Q   | +   | V   | +   | W   | H   | +   | +   | Q   | R   | K   | G   | A   | W   | I   | +   | +   | E   | +   | S   | H   | D   | H                   | +   | 8  | 32% |
|                 | 1MZN | H                               | W   | R   | +   | +   | +   | M   | +   | +   | M   | R   | +   | P   | G   | +   | +   | E   | +   | H   | +   | E   | M   | F   | E                   | R   | 10 | 40% |
