# Supplementary material
Source: PubMed Central journal article supplement (PMC1963498)
Supplement: pcbi.0030164.st020.pdf [file pcbi.0030164.st020.pdf]

**TABLE S20**

| Design Protocol |      | PAPD Interface Residues |   |   |   |   |   |   |    |    |     |     |     |     |     |     |     |     |     |     |     | Identical to Native |     |     |     |     |    |     |
|-----------------|------|-------------------------|---|---|---|---|---|---|----|----|-----|-----|-----|-----|-----|-----|-----|-----|-----|-----|-----|---------------------|-----|-----|-----|-----|----|-----|
|                 |      | 1                       | 3 | 4 | 5 | 6 | 7 | 8 | 31 | 91 | 104 | 105 | 106 | 107 | 108 | 109 | 110 | 112 | 152 | 154 | 163 | 164                 | 166 | 170 | 194 | 200 | #  | %   |
| <b>NATIVE</b>   |      | A                       | S | L | D | R | T | R | Y  | R  | Q   | I   | A   | L   | Q   | T   | K   | K   | T   | I   | A   | E                   | G   | T   | I   | R   | 25 |     |
| <b>MULTI</b>    |      | E                       | R | M | G | E | F | + | H  | +  | H   | +   | L   | M   | E   | E   | E   | Y   | V   | H   | F   | +                   | S   | W   | R   | +   | 5  | 20% |
| SINGLE          | 1NOL | S                       | P | Y | F | E | R | + | W  | +  | +   | M   | L   | +   | F   | I   | W   | Y   | V   | M   | R   | W                   | +   | Y   | K   | K   | 5  | 20% |
|                 | 1PDK | H                       | R | Y | R | K | + | + | H  | +  | W   | H   | W   | +   | K   | V   | +   | R   | V   | M   | W   | W                   | M   | W   | R   | W   | 4  | 20% |
|                 | 1QPP | F                       | Y | M | W | H | W | G | P  | W  | H   | R   | K   | W   | A   | +   | W   | Y   | W   | D   | I   | R                   | S   | W   | E   | +   | 2  | 8%  |
