# Supplementary material
Source: PubMed Central journal article supplement (PMC1963498)
Supplement: pcbi.0030164.st021.pdf [file pcbi.0030164.st021.pdf]

**TABLE S21**

| PROMISCUOUS PROTEIN    | DIP ID NUMBER | ORGANISM                        | EVALUE    | DIP PROTEIN DESCRIPTION                                   |
|------------------------|---------------|---------------------------------|-----------|-----------------------------------------------------------|
| 1 FYN SH3              | DIP:198N      | <i>Mus musculus</i>             | 2.00E-29  | Protein-tyrosine Kinase Fyn                               |
| 2 IMPORTIN BETA        | DIP:2357N     | <i>Saccharomyces cerevisiae</i> | 3.00E-82  | KAP95 Protein                                             |
| 3 OVOMUCOID INHIBITOR  | N/A           | N/A                             | N/A       | N/A                                                       |
| 4 CHEY                 | DIP:6052N     | <i>Escherichia coli</i>         | 8.00E-38  | Chemotaxis Protein CheY                                   |
| 5 THIOREDOXIN          | DIP:5552N     | <i>Saccharomyces cerevisiae</i> | 4.00E-12  | Thioredoxin I                                             |
| 6 HPR                  | DIP:6180N     | <i>Escherichia coli</i>         | 1.00E-09  | Phosphocarrier protein HPr (Histidine-containing protein) |
| 7 IL6                  | DIP:95N       | <i>Homo sapiens</i>             | 1.00E-179 | Membrane Glycoprotein GP130 Precursor                     |
| 8 BETA LACTAMASE       | N/A           | N/A                             | N/A       | N/A                                                       |
| 9 ELASTASE             | DIP:378N      | <i>Sus scrofa domestica</i>     | 1.00E-132 | Pancreatic Elastase I Precursor                           |
| 10 PPR                 | DIP:241N      | <i>Homo sapiens</i>             | 6.00E-97  | Peroxisome Proliferator-activated Receptor                |
| 11 RAN                 | DIP:1357N     | <i>Saccharomyces cerevisiae</i> | 1.00E-101 | GTP-binding protein GSP2                                  |
| 12 RAS                 | DIP:2263N     | <i>Saccharomyces cerevisiae</i> | 3.00E-47  | GTP-binding protein RAS2                                  |
| 13 ACTIN               | DIP:310N      | <i>Saccharomyces cerevisiae</i> | 0         | actin                                                     |
| 14 TRANSDUCIN BETA GAM | DIP:954N      | <i>Saccharomyces cerevisiae</i> | 2.00E-66  | GTP-binding protein beta chain STE4                       |
| 15 FC IGG1             | N/A           | N/A                             | N/A       | N/A                                                       |
| 16 RAC                 | DIP:862N      | <i>Drosophila melanogaster</i>  | 1.00E-96  | GTP-binding Protein Rac2                                  |
| 17 UBIQUITIN           | DIP:1549N     | <i>Saccharomyces cerevisiae</i> | 9.00E-32  | Ubiquitin                                                 |
| 18 CDC42               | DIP:862N      | <i>Saccharomyces cerevisiae</i> | 4.00E-87  | Cell Division Control Protein CDC42                       |
| 19 RXR RECEPTOR        | DIP:641N      | <i>Homo sapiens</i>             | 1.00E-138 | Retinoic Acid Receptor X-alpha                            |
| 20 PAPD                | DIP:6196N     | <i>Escherichia coli</i>         | 1.00E-120 | Chaperone Protein PapD Precursor                          |
