# Supplementary material
Source: PubMed Central journal article supplement (PMC1963498)

**FIGURE S1**

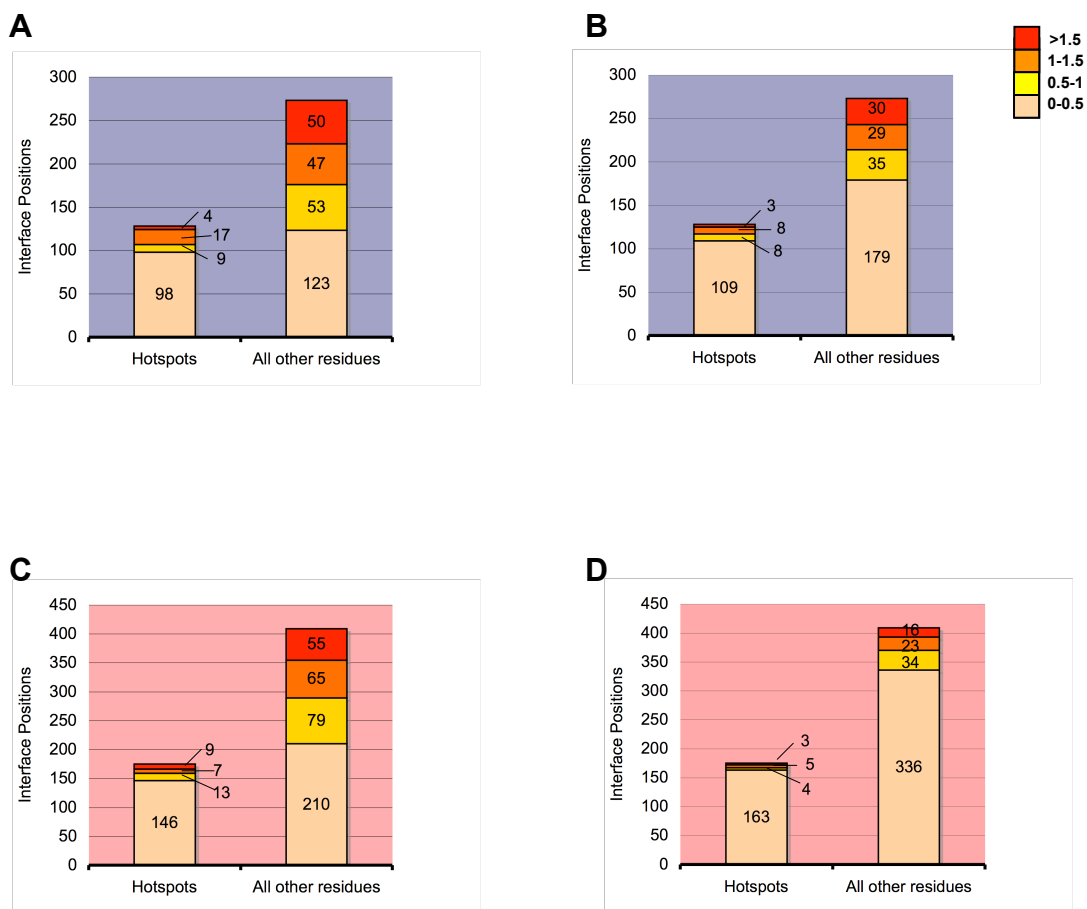

Supplement: pcbi.0030164.sg001.pdf [file pcbi.0030164.sg001.pdf]

**FIGURE S2**

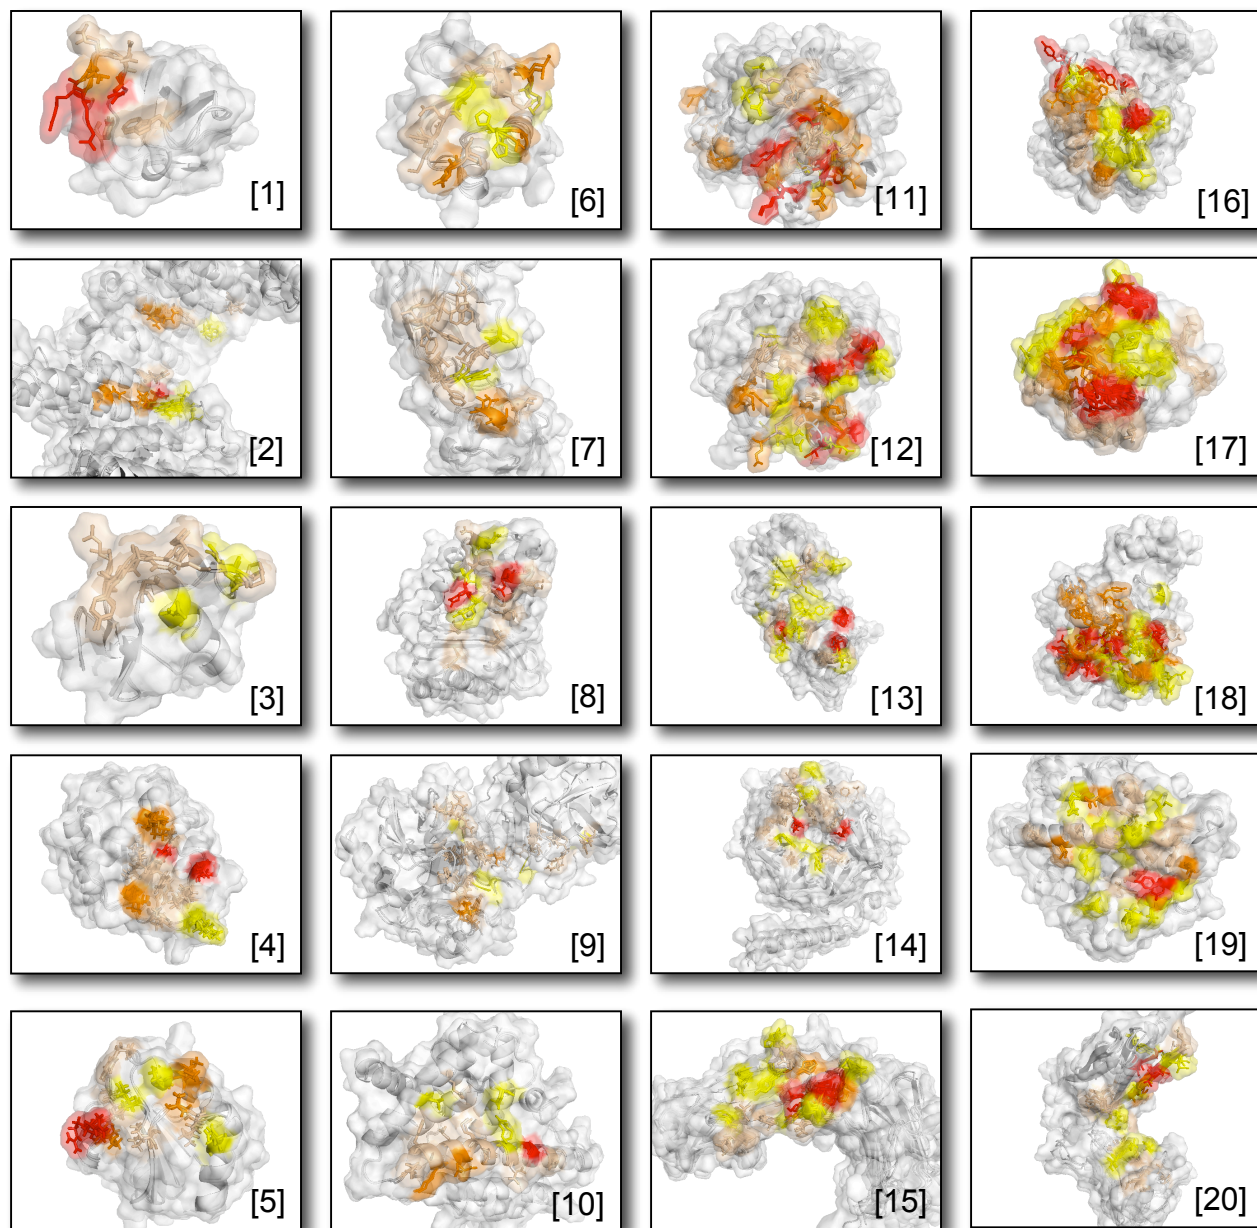

Supplement: pcbi.0030164.sg002.pdf [file pcbi.0030164.sg002.pdf]

**FIGURE S3**

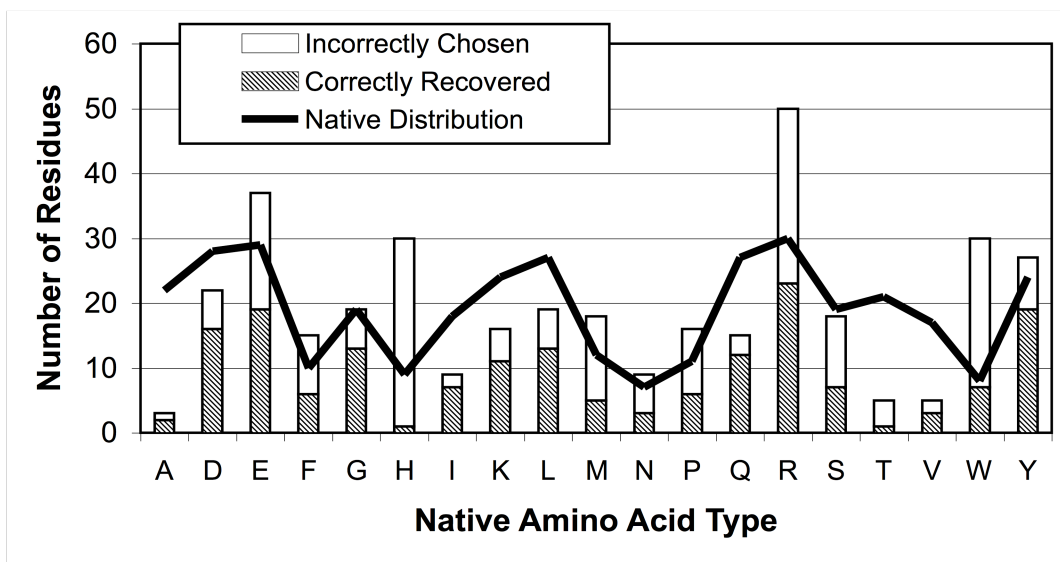

Supplement: pcbi.0030164.sg003.pdf [file pcbi.0030164.sg003.pdf]
